# Supplementary material for: A molecular container providing supramolecular protection against acetylcholine hydrolysis
Source: Royal Society of Chemistry journal article supplement (doi:10.1039/d4ob00024b), 2024-01-01
Supplement: d4ob00024b1.pdf [file d4ob00024b1.pdf]

# **A Molecular Container Providing Supramolecular Protection Against Acetylcholine Hydrolysis**

Yi-Long Lu,<sup>a</sup> Jing Su,<sup>a</sup> Jian-Wei Li<sup>\*b</sup> and Wen-Rong Xu<sup>\*a</sup>

<sup>a</sup>*Key Laboratory of Advanced Materials of Tropical Island Resources of Ministry of Education, School of Chemistry and Chemical Engineering, Hainan University, Haikou 570228, PR China*

<sup>b</sup>*MediCity Research Laboratory, University of Turku, Tykistökatu 6, FI-20520 Turku, Finland*

*\*Corresponding authors: W.-R. Xu (E-mail: [xuwr2016@hainanu.edu.cn](mailto:xuwr2016@hainanu.edu.cn))*

*J.-W. Li (E-mail: [jianwei.li@utu.fi](mailto:jianwei.li@utu.fi))*

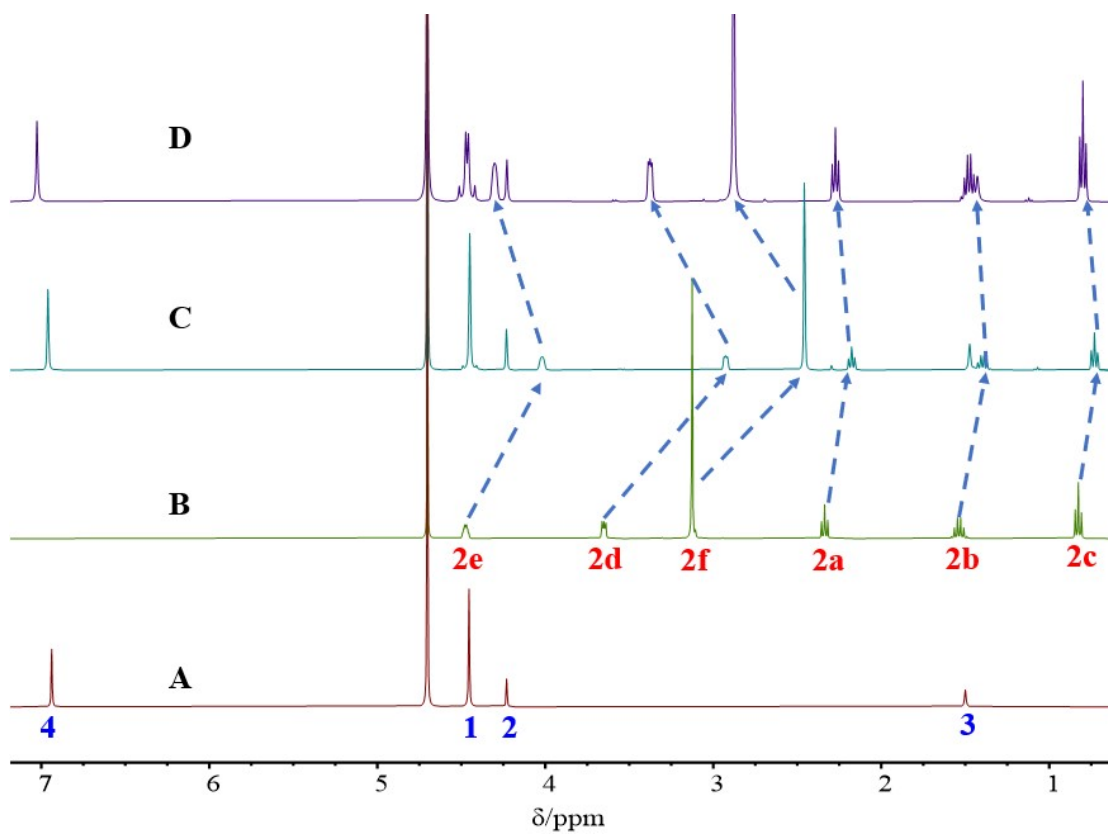

Fig. S1  $^1\text{H}$  NMR spectra (400 MHz,  $\text{D}_2\text{O}$ , 295 K): A. **TBtQ-C6** (2 mM); B. **G2** (2 mM); C. **TBtQ-C6** (2 mM) and **G2** (2 mM); D. **TBtQ-C6** (2 mM) and **G2** (6 mM).

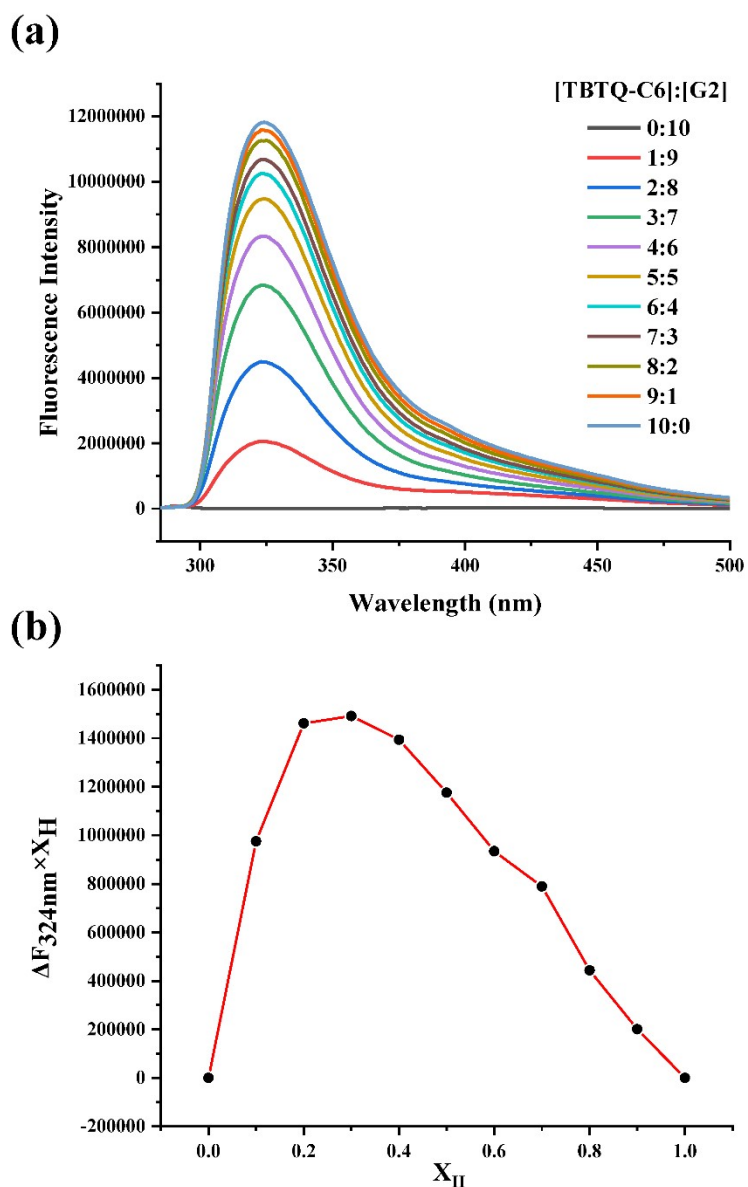

Fig. S2 (a) Fluorescence spectra of the mixture of **TBTQ-C6** and **G2** in different molar ratios at a constant total concentration of 10  $\mu\text{M}$ ; (b) Job's plot curve of **TBTQ-C6** and **G2** obtained by plotting fluorescence changes at 324 nm against the molar fraction of **TBTQ-C6** ( $X_H$ ).

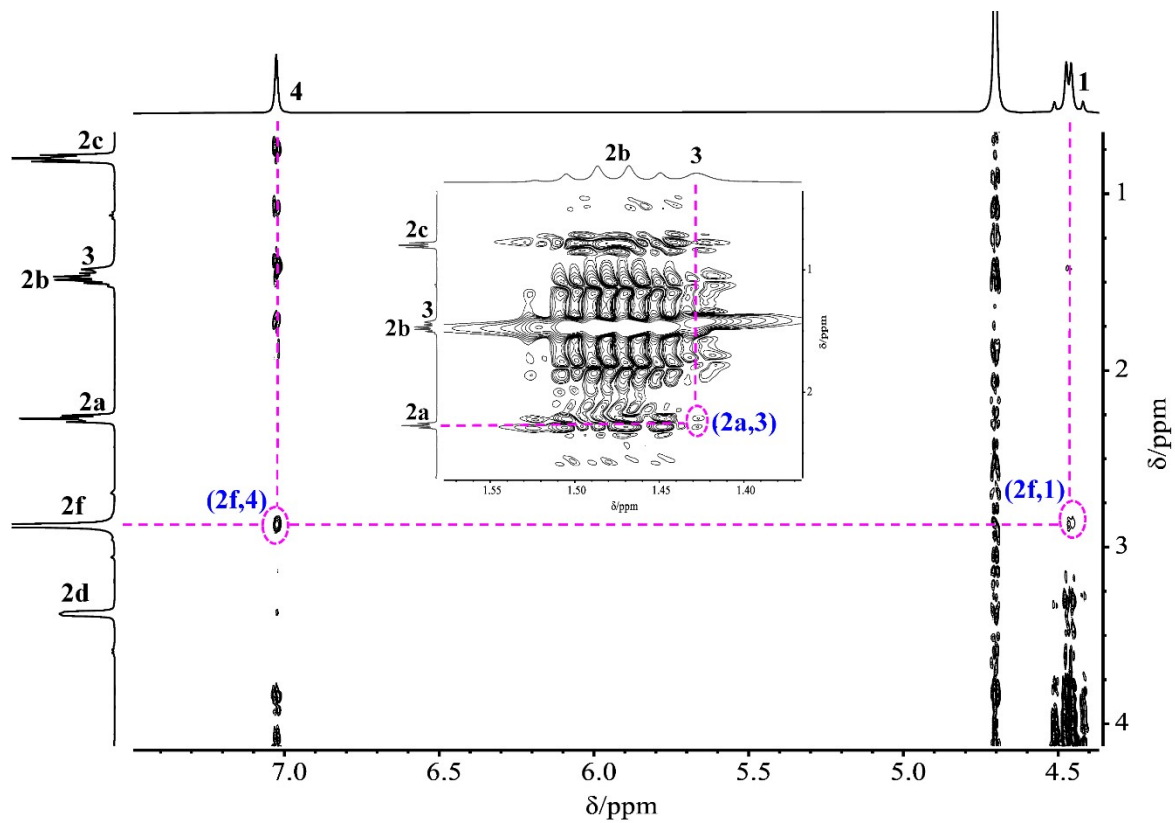

Fig. S3 Partial 2D NOESY NMR spectra (400 MHz, D<sub>2</sub>O, 295 K) of TBTQ-C6 (30 mM) and G2 (90 mM).

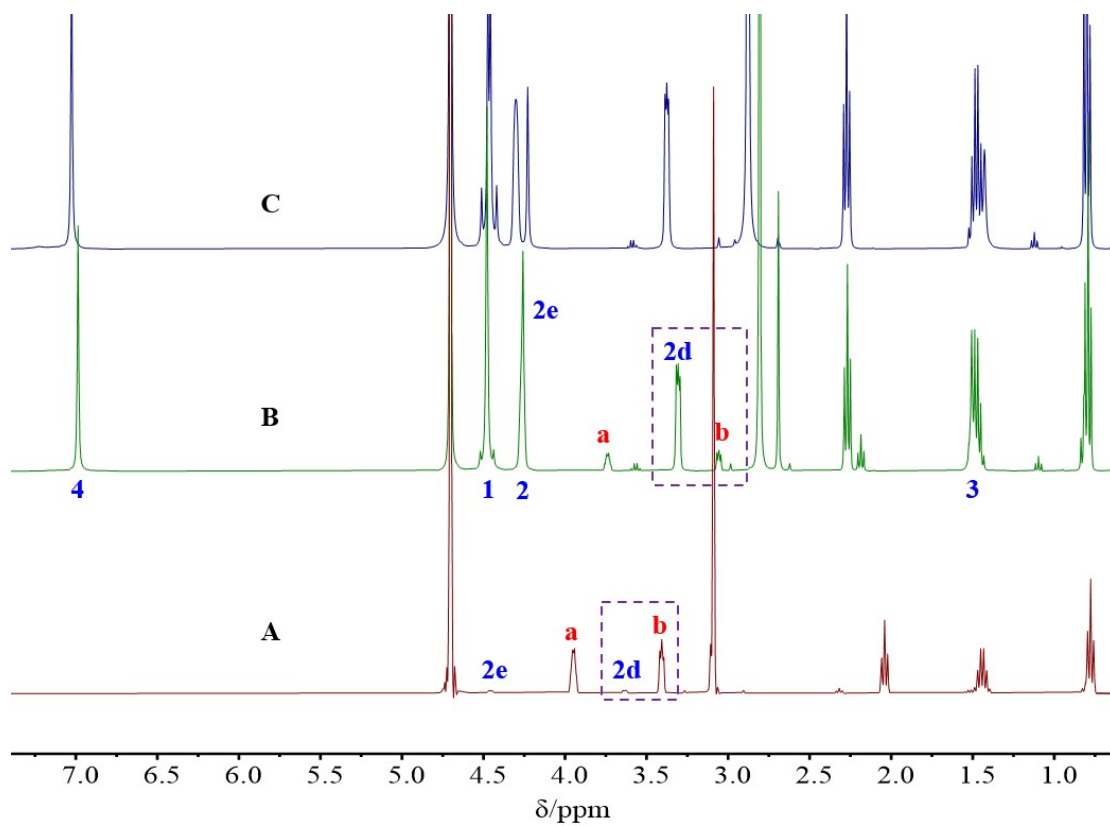

Fig. S4 <sup>1</sup>H NMR spectra (400 MHz, D<sub>2</sub>O, 295 K): A. G2 (90 mM) + BChE (1 U/mL); B. TBtQ-C6 (30 mM) + G2 (90 mM) + BChE (1 U/mL); C. TBtQ-C6 (30 mM) + G2 (90 mM).

Table S1. Association constants ( $K$ ), thermodynamic data and interaction factor ( $a$ ), for the host-guest complexation of **TBTQ-C6** with **G1** and **G2** determined from ITC experiments in water at 298.15 K.

| Guest     | $K$ ( $M^{-1}$ ) | $\Delta H$ (kJ/mol) | $\Delta S$ (J/mol·K)     | $\Delta G$ (kJ/mol)         | $a_1^{[a]}$              | $a_2^{[a]}$ |      |
|-----------|------------------|---------------------|--------------------------|-----------------------------|--------------------------|-------------|------|
| <b>G1</b> | $K_1$            | (9.03±1.73)E4       | $\Delta H_1$ -2392±101   | $\Delta S_1$ (-7.93±0.34)E3 | $\Delta G_1$ -28.19±0.53 |             |      |
|           | $K_2$            | (2.94±0.33)E4       | $\Delta H_2$ 2762±106    | $\Delta S_2$ (9.35±0.35)E3  | $\Delta G_2$ -25.47±0.28 | 0.98        | 5.53 |
|           | $K_3$            | (5.42±0.23)E4       | $\Delta H_3$ -1802±85    | $\Delta S_3$ (-5.95±0.28)E3 | $\Delta G_3$ -27.01±0.11 |             |      |
| <b>G2</b> | $K_1$            | (1.70±0.12)E2       | $\Delta H_1$ -61.70±4.6  | $\Delta S_1$ (-1.64±0.16)E2 | $\Delta G_1$ -12.75±0.18 |             |      |
|           | $K_2$            | (2.19±0.07)E3       | $\Delta H_2$ 76.75±5.6   | $\Delta S_2$ (3.02±0.19)E2  | $\Delta G_2$ -13.35±0.08 | 38.65       | 0.09 |
|           | $K_3$            | (6.78±0.41)E1       | $\Delta H_3$ -99.24±11.9 | $\Delta S_3$ (-2.78±0.40)E2 | $\Delta G_3$ -16.15±0.15 |             |      |

[a] Interaction factor  $a_1 = 3 K_2/K_1$ ,  $a_2 = 3 K_3/K_2$  ( $a_1$  or  $a_2 > 1$ : positive cooperativity;  $a_1$  or  $a_2 < 1$ : negative cooperativity;  $a_1$  or  $a_2 = 1$ : no cooperativity).
